# Supplementary material for: Influence of Mycorrhiza on C:N:P Stoichiometry in Senesced Leaves
Source: MDPI journal article supplement (doi:10.3390/jof9050588), 2023-05-18
Supplement: s1 [file s1]

**Table S1.** The number of species in all groups in the database.

| <b>Groups</b>      | <b>AM</b> | <b>AM+ECM</b> | <b>ECM</b> | <b>Total</b> |
|--------------------|-----------|---------------|------------|--------------|
| <b>Total</b>       | 244       | 45            | 108        | 397          |
| <b>Boreal</b>      | 48        | 14            | 32         | 94           |
| <b>Temperate</b>   | 81        | 27            | 80         | 188          |
| <b>Tropical</b>    | 103       | 14            | 16         | 133          |
| <b>Woody plant</b> | 175       | 44            | 108        | 327          |
| <b>Deciduous</b>   | 91        | 23            | 49         | 163          |
| <b>Evergreen</b>   | 89        | 21            | 59         | 169          |
| <b>Broadleaf</b>   | 161       | 39            | 71         | 271          |
| <b>Conifer</b>     | 13        | 5             | 37         | 55           |
